# Supplementary material for: Anti-Inflammatory and Proliferative Properties of Luteolin-7-O-Glucoside
Source: MDPI journal article supplement (doi:10.3390/ijms22031321), 2021-01-28
Supplement: s1 [file s1]

TABLE S1 In table are reported all genes amplified with significative regulat

| RefSeq    | Symbol  | DDct       | Fold       | Regulation | p-value <0.05 |
|-----------|---------|------------|------------|------------|---------------|
| NM_014440 | IL1F6   | 5,5812664  | 0,02088678 | -47,877184 | yes           |
| NM_001837 | CCR3    | 3,44150543 | 0,09204573 | -10,864165 | 0,056         |
| NM_006274 | CCL19   | 3,40104866 | 0,09466345 | -10,563739 | yes           |
| NM_002983 | CCL3    | 3,38814354 | 0,09551403 | -10,469666 | yes           |
| NM_000648 | CCR2    | 3,22750664 | 0,10676372 | -9,3664778 | 0,057         |
| NM_000609 | CXCL12  | 3,12538147 | 0,1145952  | -8,7263689 | yes           |
| NM_006273 | CCL7    | 2,90812111 | 0,13321966 | -7,5063997 | yes           |
| NM_002982 | CCL2    | 2,53096581 | 0,17302282 | -5,7795846 | yes           |
| NM_012275 | IL1F5   | 2,40226746 | 0,18916703 | -5,2863335 | yes           |
| NM_002986 | CCL11   | 2,30966759 | 0,20170691 | -4,9576884 | yes           |
| NM_005408 | CCL13   | 2,27082062 | 0,20721199 | -4,8259756 | yes           |
| NM_005201 | CCR8    | 1,72785568 | 0,30190035 | -3,3123513 | yes           |
| NM_005623 | CCL8    | 1,63664627 | 0,32160321 | -3,1094217 | yes           |
| NM_181657 | LTB4R   | 1,60371399 | 0,32902885 | -3,0392471 | yes           |
| NM_000576 | IL1B    | 1,59129333 | 0,3318738  | -3,0131935 | yes           |
| NM_032965 | CCL15   | 1,53470993 | 0,34514873 | -2,8973017 | yes           |
| NM_002989 | CCL21   | 1,53198051 | 0,34580233 | -2,8918255 | yes           |
| NM_001337 | CX3CR1  | 1,47785378 | 0,35902251 | -2,7853406 | yes           |
| NM_001090 | ABCF1   | 1,40206528 | 0,37838708 | -2,6427964 | yes           |
| NM_001838 | CCR7    | 1,26000595 | 0,41754224 | -2,3949673 | yes           |
| NM_002991 | CCL24   | 1,17534637 | 0,44277744 | -2,258471  | yes           |
| NM_002981 | CCL1    | 1,1626873  | 0,44667973 | -2,2387405 | yes           |
| NM_001101 | ACTB    | 1,15596771 | 0,44876507 | -2,2283374 | yes           |
| NM_002987 | CCL17   | 1,09645462 | 0,46766436 | -2,1382857 | yes           |
| NM_000194 | HPRT1   | 1,08899498 | 0,47008874 | -2,1272579 | yes           |
| NM_001511 | CXCL1   | 1,01597977 | 0,49449239 | -2,0222758 | yes           |
| SA_00104  | RTC     | 0,99015999 | 0,50342194 | -1,9864053 | yes           |
| NM_000877 | IL1R1   | 0,97197151 | 0,50980891 | -1,9615193 | yes           |
| NM_005624 | CCL25   | 0,94195747 | 0,52052614 | -1,9211331 | yes           |
| NM_001560 | IL13RA1 | 0,74010658 | 0,59869512 | -1,6702992 | yes           |
| NM_000582 | SPP1    | 0,73706436 | 0,59995893 | -1,6667808 | yes           |
| NM_019009 | TOLLIP  | 0,71012878 | 0,61126557 | -1,6359501 | yes           |
| NM_000064 | C3      | 0,67518997 | 0,62624975 | -1,596807  | yes           |
| NM_002415 | MIF     | 0,63177109 | 0,64538364 | -1,549466  | yes           |
| NM_173161 | IL1F10  | 0,57015228 | 0,67354569 | -1,4846803 | yes           |
| SA_00104  | RTC     | 0,5293293  | 0,69287677 | -1,4432581 | yes           |
| NM_001295 | CCR1    | 0,50315666 | 0,7055613  | -1,4173113 | 0,1246        |
| NM_000572 | IL10    | 0,33763695 | 0,79133641 | -1,2636851 | yes           |
| NM_005283 | XCR1    | 0,30703735 | 0,80829994 | -1,2371645 | yes           |
| NM_000074 | CD40LG  | 0,29679108 | 0,81406106 | -1,2284091 | yes           |
| NM_002994 | CXCL5   | 0,26833916 | 0,83027482 | -1,2044205 | 0,82          |
| NM_002341 | LTB     | 0,22827911 | 0,85365254 | -1,1714368 | yes           |
| NM_002188 | IL13    | 0,00016403 | 0,99988631 | -1,0001137 | yes           |
| NM_004048 | B2M     | 0          | 1          |            | yes           |
| NM_005064 | CCL23   | -0,0061283 | 1,00425686 | 1,00425686 | yes           |

|           |         |            |            |            |     |
|-----------|---------|------------|------------|------------|-----|
| NM_173205 | IL1F7   | -0,0591297 | 1,0418371  | 1,0418371  | yes |
| NM_001735 | C5      | -0,0976505 | 1,07002947 | 1,07002947 | yes |
| NM_004757 | SCYE1   | -0,1027546 | 1,0738218  | 1,0738218  | yes |
| NM_006419 | CXCL13  | -0,1665478 | 1,12236955 | 1,12236955 | yes |
| SA_00103  | PPC     | -0,3123531 | 1,2417314  | 1,2417314  | yes |
| NM_002046 | GAPDH   | -0,3188286 | 1,24731736 | 1,24731736 | yes |
| NM_004590 | CCL16   | -0,3468838 | 1,27181054 | 1,27181054 | yes |
| NM_000595 | LTA     | -0,4533558 | 1,36922144 | 1,36922144 | yes |
| NM_000577 | IL1RN   | -0,5293217 | 1,44325045 | 1,44325045 | yes |
| NM_173178 | IL1F8   | -0,5861187 | 1,5012026  | 1,5012026  | yes |
| NM_000575 | IL1A    | -0,5952702 | 1,51075546 | 1,51075546 | yes |
| SA_00103  | PPC     | -0,6772728 | 1,59911401 | 1,59911401 | yes |
| NM_004367 | CCR6    | -0,6992035 | 1,62360815 | 1,62360815 | yes |
| NM_000628 | IL10RB  | -0,7097416 | 1,63551115 | 1,63551115 | yes |
| NM_000594 | TNF     | -0,7638912 | 1,69806445 | 1,69806445 | yes |
| NM_012423 | RPL13A  | -0,7862797 | 1,72462139 | 1,72462139 | yes |
| NM_000879 | IL5     | -0,8671341 | 1,82403586 | 1,82403586 | yes |
| NM_007293 | C4A     | -0,9030132 | 1,86996754 | 1,86996754 | yes |
| NM_002089 | CXCL2   | -0,903965  | 1,87120159 | 1,87120159 | yes |
| NM_006641 | CCR9    | -0,9751682 | 1,96587042 | 1,96587042 | yes |
| NM_005409 | CXCL11  | -1,0747337 | 2,10633329 | 2,10633329 | yes |
| NM_004887 | CXCL14  | -1,0823326 | 2,11745691 | 2,11745691 | yes |
| NM_013278 | IL17C   | -1,1250477 | 2,18108755 | 2,18108755 | yes |
| NM_002993 | CXCL6   | -1,1971207 | 2,29281613 | 2,29281613 | yes |
| NM_006072 | CCL26   | -1,2520542 | 2,3818032  | 2,3818032  | yes |
| NM_000605 | IFNA2   | -1,2796478 | 2,42779705 | 2,42779705 | yes |
| NM_000584 | IL8     | -1,2816257 | 2,43112782 | 2,43112782 | yes |
| SA_00103  | PPC     | -1,2923317 | 2,44923583 | 2,44923583 | yes |
| NM_002985 | CCL5    | -1,6264343 | 3,08748971 | 3,08748971 | yes |
| NM_002186 | IL9R    | -1,8166695 | 3,52267032 | 3,52267032 | yes |
| SA_00105  | HGDC    | -1,8822346 | 3,68645609 | 3,68645609 | yes |
| NM_000590 | IL9     | -2,1250935 | 4,36231352 | 4,36231352 | yes |
| NM_005194 | CEBPB   | -2,1470165 | 4,42910907 | 4,42910907 | yes |
| NM_002090 | CXCL3   | -2,7298298 | 6,63377366 | 6,63377366 | yes |
| NM_021571 | ICEBERG | -2,8145866 | 7,0351766  | 7,0351766  | yes |
| NM_000567 | CRP     | -3,655405  | 12,6004648 | 12,6004648 | yes |
| NM_019618 | IL1F9   | -3,6586285 | 12,6286495 | 12,6286495 | yes |
| NM_000579 | CCR5    | -3,7510548 | 13,4641828 | 13,4641828 | yes |
| NM_002984 | CCL4    | -5,235136  | 37,6645668 | 37,6645668 | yes |
| NM_005508 | CCR4    | -6,1016541 | 68,6721893 | 68,6721893 | yes |
