# Supplementary material for: Anti-Inflammatory and Proliferative Properties of Luteolin-7-O-Glucoside
Source: MDPI journal article supplement (doi:10.3390/ijms22031321), 2021-01-28
Supplement: s1 [file s1]

Data as relative expression  
Only significant genes have been reported

| DOWNREGULATED |                     |
|---------------|---------------------|
| GENE          | IL22 (-) Regulation |
| KRT10         | -10,22              |
| AQP9          | -6,88               |
| CCL22         | -5,69               |
| RNASE7        | -4,59               |
| NTRK2         | -4,25               |
| RARRES2       | -3,72               |
| TYRP1         | -3,16               |
| TAC1          | -3,00               |
| PRKCB         | -2,84               |
| CXCR4         | -2,84               |
| EREG          | -2,81               |
| CD52          | -2,73               |
| CEBPA         | -2,64               |
| IL12RB1       | -2,37               |
| LGALS4        | -2,36               |
| IFRD1         | -2,34               |
| IL1B          | -2,27               |
| DRD5          | -2,18               |
| IL6           | -2,17               |
| CAMP          | -2,13               |
| ZNF43         | -2,11               |
| DUSP1         | -2,08               |
| CCR1          | -2,07               |
| IL12A         | -2,05               |
| MMP9          | -1,99               |
| HBEGF         | -1,94               |
| PPARD         | -1,92               |
| IL18          | -1,91               |
| IL10RA        | -1,80               |
| IL1A          | -1,79               |
| KLF4          | -1,77               |
| LGALS1        | -1,76               |
| CCL5          | -1,74               |
| IL36G         | -1,73               |
| CLDN23        | -1,72               |
| ZFP36         | -1,68               |
| HIST1H1C      | -1,62               |
| IL8           | -1,62               |
| SATB1         | -1,62               |
| IL15          | -1,61               |
| CCNE1         | -1,58               |
| SERPINB3      | -1,57               |
| LGALS3        | -1,56               |
| MAFF          | -1,55               |
| CXCL2         | -1,54               |
| NFAT5         | -1,51               |
| KRT6B         | -1,48               |
| ADM           | -1,47               |
| CLK1          | -1,46               |
| IL1RN         | -1,46               |
| HSPA1A        | -1,43               |
| HBB           | -1,42               |
| TLR9          | -1,42               |
| CDH4          | -1,40               |
| CCR6          | -1,39               |
| HSPA1B        | -1,39               |
| TGFA          | -1,38               |
| CEBPB         | -1,38               |
| FOXP3         | -1,37               |
| DPP4          | -1,35               |
| CREM          | -1,33               |
| CDKN1A        | -1,33               |
| RBBP7         | -1,33               |
| PTCH1         | -1,31               |
| MALT1         | -1,29               |
| GAPDH         | -1,28               |
| IL10RB        | -1,28               |
| PTHLH         | -1,27               |
| NOTCH2        | -1,27               |
| LGALS8        | -1,27               |
| CLIC1         | -1,26               |
| PMF1          | -1,26               |
| TNF           | -1,26               |
| CDH1          | -1,24               |
| BSG           | -1,24               |
| REL           | -1,23               |
| MAP2K1        | -1,23               |
| IL7R          | -1,23               |
| ADORA2B       | -1,22               |
| CFLAR         | -1,22               |
| HLA-C         | -1,22               |
| EPHA2         | -1,22               |
| ELAVL1        | -1,21               |
| HES1          | -1,20               |
| TJP1          | -1,20               |
| CXCL11        | -1,19               |
| SERPINB6      | -1,19               |
| TPMT          | -1,19               |
| BTF3          | -1,19               |
| TCEB3         | -1,18               |
| KRT5          | -1,18               |
| RUNX1         | -1,18               |
| AREG          | -1,17               |
| RPL35A        | -1,17               |

| DOWNREG-Partially Reverted |           |          |  |
|----------------------------|-----------|----------|--|
| Gene                       | IL-22     | IL22+Lut |  |
| KRT10                      | -10,22446 | -1,43537 |  |
| RNASE7                     | -4,59319  | -1,3256  |  |
| NTRK2                      | -4,25193  | -1,57289 |  |
| TYRP1                      | -3,1568   | 1,07081  |  |
| PRKCB                      | -2,84323  | 1,54631  |  |
| CXCR4                      | -2,84265  | 2,50617  |  |
| IL12RB1                    | -2,37313  | 1,32389  |  |
| LGALS4                     | -2,35633  | 1,06707  |  |
| ZNF43                      | -2,10745  | 1,15024  |  |
| IL10RA                     | -1,80277  | -0,25803 |  |
| HIST1H1C                   | -1,62243  | 1,407    |  |
| SATB1                      | -1,62043  | 1,47078  |  |
| LGALS3                     | -1,56426  | 1,02337  |  |
| NFAT5                      | -1,50761  | 1,06318  |  |
| ADM                        | -1,46506  | 1,49276  |  |
| CLK1                       | -1,46238  | 1,48809  |  |
| HSPA1A                     | -1,4269   | 1,21142  |  |
| HBB                        | -1,42189  | 2,26649  |  |
| CCR6                       | -1,39115  | 3,00321  |  |
| HSPA1B                     | -1,38522  | 1,2133   |  |
| CREM                       | -1,33452  | 1,31962  |  |
| PTCH1                      | -1,30915  | 1,62735  |  |
| MALT1                      | -1,2897   | 1,04492  |  |
| IL10RB                     | -1,27835  | 1,67595  |  |
| KLF4                       | -1,77     | -1,41369 |  |

| UPREG-Partially Reverted |         |          |  |
|--------------------------|---------|----------|--|
| Gene                     | IL-22   | IL22+Lut |  |
| PTGS2                    | 1,69    | 0,85     |  |
| DEFB1                    | 1,83    | 0,98     |  |
| TNFSF11                  | 1,84    | 0,90     |  |
| S100A8                   | 2,02    | 1,24     |  |
| TLR2                     | 2,02    | 1,18     |  |
| IL33                     | 2,37    | 0,24     |  |
| IL23R                    | 3,15    | 1,32     |  |
| VNN3                     | 4,04    | 2,07     |  |
| SPP1                     | 4,42    | 1,65     |  |
| CLEC7A                   | 8,12    | 3,20     |  |
| S100A7                   | 11,91   | 1,77     |  |
| DEFB4A                   | 185,12  | 36,94    |  |
| TLR9                     | -1,4199 | 1,40     |  |

| UPREGULATED |                     |
|-------------|---------------------|
| Target      | IL22 (+) Regulation |
| IL10        | 1,30                |
| TP63        | 1,30                |
| TLR3        | 1,32                |
| KRT6A       | 1,35                |
| LYN         | 1,37                |
| VNN2        | 1,37                |
| CXCR3       | 1,38                |
| CCL20       | 1,40                |
| TSLP        | 1,47                |
| TNFSF10     | 1,48                |
| PTGS2       | 1,49                |
| CLDN4       | 1,55                |
| GLI1        | 1,57                |
| DEFB1       | 1,61                |
| TNFSF11     | 1,62                |
| S100A8      | 1,78                |
| TLR2        | 1,78                |
| PTGES       | 1,98                |
| IL33        | 2,37                |
| IL23R       | 3,15                |
| VNN3        | 4,04                |
| SPP1        | 4,42                |
| CLEC7A      | 7,16                |
| S100A7      | 10,50               |
| DEFB4A      | 163,08              |
| TLR9        | 0,80                |
