# Supplementary material for: Anti-Inflammatory and Proliferative Properties of Luteolin-7-O-Glucoside
Source: Int J Mol Sci. 2021 Jan 28;22(3):1321. doi: 10.3390/ijms22031321 (PMC7865871; doi:10.3390/ijms22031321)
Supplement: Supplementary file 1 [file ijms-22-01321-s001.zip]

Archive with 8 entries (8 files):
- Figure S1.pdf
- __MACOSX/._Figure S1.pdf
- Figure S2.pdf
- __MACOSX/._Figure S2.pdf
- Table S1.pdf
- __MACOSX/._Table S1.pdf
- Table S2.pdf
- __MACOSX/._Table S2.pdf
