# Supplementary figures and images for: Anti-Inflammatory and Proliferative Properties of Luteolin-7-O-Glucoside
Source: MDPI journal article supplement (doi:10.3390/ijms22031321), 2021-01-28

**luteolin-7-O-glucoside**

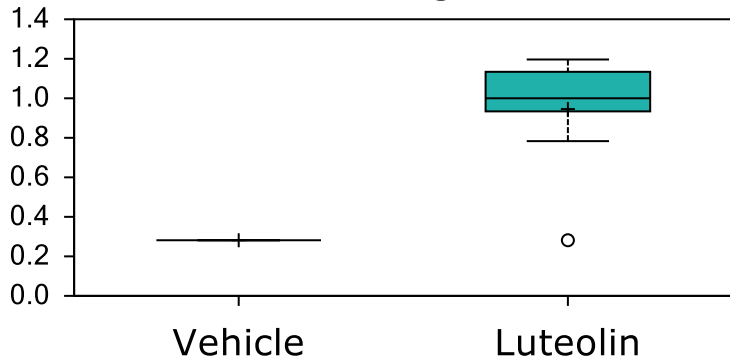

**luteolin**

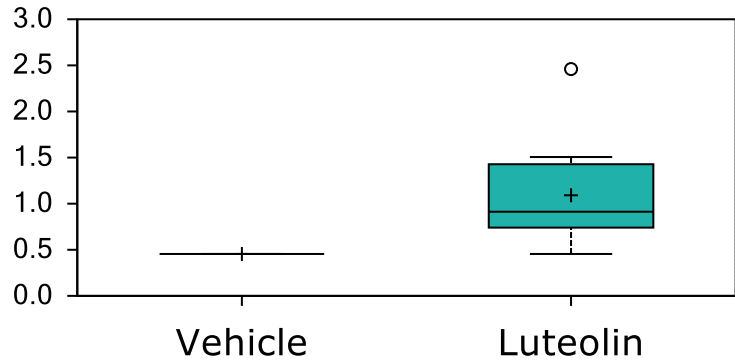

Supplement: s1 [file s1]
